# Supplementary material for: The High Capacity of Brazilian Aedes aegypti Populations to Transmit a Locally Circulating Lineage of Chikungunya Virus
Source: MDPI journal article supplement (doi:10.3390/v16040575), 2024-04-09
Supplement: s1 [file Table S1.pdf › Table S1.pdf]

Reserved space. Do not place any text in this section. Include the mandatory author checklist or your manuscript will be returned.

**Table S1.** Summary of Logistic Regression Model for CHIKV Infection Rates.

| 4 days post feeding                           |             |           |             |              |                          |                              |
|-----------------------------------------------|-------------|-----------|-------------|--------------|--------------------------|------------------------------|
| Predictors                                    | Category    | Reference | Odds Ratios | CI (95%)     | P-value<br>(Wald's test) | Overall<br>P-value (LR-test) |
| Population                                    | (Intercept) |           | 0.16        | 0.04 – 0.46  | 0.003                    | 0.2093                       |
|                                               | JAB         | ARA       | 0.00        | NA           | 0.994                    |                              |
|                                               | PET         | ARA       | 0.63        | 0.08 – 4.23  | 0.637                    |                              |
|                                               | POA         | ARA       | 0.63        | 0.08 – 4.23  | 0.637                    |                              |
| Observations 88<br>R <sup>2</sup> Tjur 0.034  |             |           |             |              |                          |                              |
| 8 days post feeding                           |             |           |             |              |                          |                              |
| Predictors                                    | Category    | Reference | Odds Ratios | CI (95%)     | P-value<br>(Wald's test) | Overall<br>P-value (LR-test) |
| Population                                    | (Intercept) |           | 0.05        | 0.00 – 0.23  | 0.003                    | 0.5197                       |
|                                               | JAB         | ARA       | 3.32        | 0.39 – 70.24 | 0.317                    |                              |
|                                               | PET         | ARA       | 3.32        | 0.39 – 70.24 | 0.317                    |                              |
|                                               | POA         | ARA       | 4.67        | 0.62 – 95.79 | 0.185                    |                              |
| Observations 88<br>R <sup>2</sup> Tjur 0.022  |             |           |             |              |                          |                              |
| 4 and 8 days post feeding                     |             |           |             |              |                          |                              |
| Predictors                                    | Category    | Reference | Odds Ratios | CI (95%)     | P-value<br>(Wald's test) | Overall<br>P-value (LR-test) |
| Population                                    | (Intercept) |           | 0.10        | 0.03 – 0.25  | <0.001                   | 0.7393                       |
|                                               | JAB         | ARA       | 0.73        | 0.14 – 3.52  | 0.695                    |                              |
|                                               | PET         | ARA       | 1.28        | 0.32 – 5.51  | 0.725                    |                              |
|                                               | POA         | ARA       | 1.58        | 0.42 – 6.59  | 0.504                    |                              |
| Observations 176<br>R <sup>2</sup> Tjur 0.007 |             |           |             |              |                          |                              |
