# Supplementary material for: The High Capacity of Brazilian Aedes aegypti Populations to Transmit a Locally Circulating Lineage of Chikungunya Virus
Source: MDPI journal article supplement (doi:10.3390/v16040575), 2024-04-09
Supplement: s1 [file Table S2.pdf › Table S2.pdf]

Reserved space. Do not place any text in this section. Include the mandatory author checklist or your manuscript will be returned.

**Table S2.** Summary of Logistic Regression Model for CHIKV Dissemination Efficiency.

| 4 days post feeding                           |             |           |                    |                 |                                        |                                            |
|-----------------------------------------------|-------------|-----------|--------------------|-----------------|----------------------------------------|--------------------------------------------|
| Predictors                                    | Category    | Reference | <i>Odds Ratios</i> | <i>CI (95%)</i> | <i>P-value</i><br><i>(Wald's test)</i> | <i>Overall</i><br><i>P-value (LR-test)</i> |
|                                               | (Intercept) |           | 0.05               | 0.040 – 0.24    | 0.003                                  |                                            |
|                                               | JAB         | ARA       | 2.00               | 0.18 – 45.09    | 0.584                                  |                                            |
| Population                                    | PET         | ARA       | 2.22               | 0.20 – 50.23    | 0.529                                  | 0.012                                      |
|                                               | POA         | ARA       | 3.16               | 0.37 – 66.97    | 0.337                                  |                                            |
| Observations 85<br>R <sup>2</sup> Tjur 0.012  |             |           |                    |                 |                                        |                                            |
| 8 days post feeding                           |             |           |                    |                 |                                        |                                            |
| Predictors                                    | Category    | Reference | <i>Odds Ratios</i> | <i>CI (95%)</i> | <i>P-value</i><br><i>(Wald's test)</i> | <i>Overall</i><br><i>P-value (LR-test)</i> |
|                                               | (Intercept) |           | 0.10               | 0.02 – 0.34     | 0.002                                  |                                            |
|                                               | JAB         | ARA       | 1.00               | 0.11 – 9.01     | 1.000                                  |                                            |
| Population                                    | PET         | ARA       | 1.00               | 0.11 – 9.01     | 1.000                                  | 0.6602                                     |
|                                               | POA         | ARA       | 2.50               | 0.43 – 19.74    | 0.324                                  |                                            |
| Observations 86<br>R <sup>2</sup> Tjur 0.021  |             |           |                    |                 |                                        |                                            |
| 4 and 8 days post feeding                     |             |           |                    |                 |                                        |                                            |
| Predictors                                    | Category    | Reference | <i>Odds Ratios</i> | <i>CI (95%)</i> | <i>P-value</i><br><i>(Wald's test)</i> | <i>Overall</i><br><i>P-value (LR-test)</i> |
|                                               | (Intercept) |           | 0.08               | 0.02 – 0.21     | <0.001                                 |                                            |
|                                               | JAB         | ARA       | 1.33               | 0.28 – 7.13     | 0.718                                  |                                            |
| Population                                    | PET         | ARA       | 1.40               | 0.29 – 7.52     | 0.670                                  | 0.5226                                     |
|                                               | POA         | ARA       | 2.67               | 0.68 – 10.10    | 0.178                                  |                                            |
| Observations 171<br>R <sup>2</sup> Tjur 0.014 |             |           |                    |                 |                                        |                                            |
