# Supplementary material for: The High Capacity of Brazilian Aedes aegypti Populations to Transmit a Locally Circulating Lineage of Chikungunya Virus
Source: MDPI journal article supplement (doi:10.3390/v16040575), 2024-04-09
Supplement: s1 [file Table S3.pdf › Table S3.pdf]

Reserved space. Do not place any text in this section. Include the mandatory author checklist or your manuscript will be returned.

**Table S3.** Summary of Logistic Regression Model for CHIKV Transmission Efficiency.

| 8 days post feeding       |             |           |             |              |                          |                              |
|---------------------------|-------------|-----------|-------------|--------------|--------------------------|------------------------------|
| Predictors                | Category    | Reference | Odds Ratios | CI (95%)     | P-value<br>(Wald's test) | Overall<br>P-value (LR-test) |
|                           | (Intercept) |           | 0.25        | 0.040 – 1.00 | 0.080                    |                              |
| Population                | JAB         | ARA       | 1.33        | 0.13 – 13.97 | 0.800                    |                              |
|                           | PET         | ARA       | 2.00        | 0.25 – 19.18 | 0.513                    | 0.9302                       |
|                           | POA         | ARA       | 1.50        | 0.20 – 13.86 | 0.697                    |                              |
| Observations 38           |             |           |             |              |                          |                              |
| R <sup>2</sup> Tjur 0.012 |             |           |             |              |                          |                              |
